# Supplementary material for: Prevalence of SARS-CoV-2 antibodies in France: results from nationwide serological surveillance
Source: PubMed Central journal article supplement (PMC8140151; doi:10.1038/s41467-021-23233-6), 2021-05-21
Supplement: 41467_2021_23233_MOESM1_ESM.pdf [file 41467_2021_23233_MOESM1_ESM.pdf]

## Supplementary Information

*Supplementary Table 1: Calibration of LuLISA N, LuLISA S and pseudo-neutralisation assays on prepandemic samples and confirmed COVID-19 cases.*

|                            | Serological Assay |          |       |                    |
|----------------------------|-------------------|----------|-------|--------------------|
|                            | LuLISA N          | LuLISA S | PNT   | LN LS PNT          |
| Readings threshold (RLU/s) | 39915             | 27821    | 14037 | as defined at left |
| Prepandemic samples        | 523               | 232      | 223   | 223                |
| Confirmed COVID-19 cases   | 309               | 45       | 99    | 45                 |
| False positive             | 0                 | 0        | 0     | 0                  |
| True positive              | 266               | 43       | 84    | 45                 |
| True negative              | 523               | 232      | 223   | 223                |
| False negative             | 43                | 2        | 15    | 0                  |
| Specificity                | 1.00              | 1.00     | 1.00  | 1.00               |
| Sensitivity                | 0.86              | 0.96     | 0.85  | 1.00               |

LN=LuLISA N assay, LS=LuLISA S assay, PNT=Pseudo-neutralisation assay. LN|LS|PNT refers to positive in any of the three assays. Readings are expressed in relative light units per second (RLU/s). Confirmed COVID-19 cases were hospitalised patients with positive RT-PCR for SARS-CoV-2.

Supplementary Table 2: Distribution of sample specimens included by collection period.

|                            | 9-15<br>March<br>2020 |      | 6 -12<br>April<br>2020 |      | 11-17<br>May 2020 |      | France   |      |
|----------------------------|-----------------------|------|------------------------|------|-------------------|------|----------|------|
|                            | n                     | %    | n                      | %    | n                 | %    | n        | %    |
| Overall                    | 3834                  | 100  | 3595                   | 100  | 3592              | 100  | 66784232 | 100  |
| Sex                        |                       |      |                        |      |                   |      |          |      |
| Male                       | 1689                  | 44.1 | 1557                   | 43.3 | 1543              | 43   | 32263970 | 48.3 |
| Female                     | 2145                  | 55.9 | 2038                   | 56.7 | 2049              | 57   | 34520262 | 51.7 |
| Age                        |                       |      |                        |      |                   |      |          |      |
| 0-9                        | 359                   | 9.4  | 167                    | 4.6  | 255               | 7.1  | 7670792  | 11.5 |
| 10-19                      | 420                   | 11   | 298                    | 8.3  | 336               | 9.4  | 8263694  | 12.4 |
| 20-29                      | 423                   | 11   | 355                    | 9.9  | 318               | 8.9  | 7434257  | 11.1 |
| 30-39                      | 500                   | 13   | 461                    | 12.8 | 409               | 11.4 | 8250560  | 12.4 |
| 40-49                      | 487                   | 12.7 | 455                    | 12.7 | 390               | 10.9 | 8556317  | 12.8 |
| 50-59                      | 461                   | 12   | 489                    | 13.6 | 469               | 13.1 | 8770338  | 13.1 |
| 60-69                      | 455                   | 11.9 | 487                    | 13.5 | 496               | 13.8 | 7991860  | 12   |
| 70-79                      | 382                   | 10   | 455                    | 12.7 | 480               | 13.4 | 5690626  | 8.5  |
| 80+                        | 347                   | 9.1  | 428                    | 11.9 | 439               | 12.2 | 4155788  | 6.2  |
| Region                     |                       |      |                        |      |                   |      |          |      |
| Guadeloupe                 | 262                   | 6.8  | 149                    | 4.1  | 252               | 7    | 376879   | 0.6  |
| Martinique                 | 111                   | 2.9  | 208                    | 5.8  | 254               | 7.1  | 358749   | 0.5  |
| Guyane                     | 96                    | 2.5  | 64                     | 1.8  | 102               | 2.8  | 290691   | 0.4  |
| La Réunion                 | 144                   | 3.8  | 90                     | 2.5  | 105               | 2.9  | 859959   | 1.3  |
| Île-de-France              | 641                   | 16.7 | 614                    | 17.1 | 534               | 14.9 | 12278210 | 18.4 |
| Centre-Val-de-Loire        | 146                   | 3.8  | 116                    | 3.2  | 122               | 3.4  | 2559073  | 3.8  |
| Bourgogne-Franche Comté    | 102                   | 2.7  | 138                    | 3.8  | 123               | 3.4  | 2783039  | 4.2  |
| Normandie                  | 208                   | 5.4  | 210                    | 5.8  | 208               | 5.8  | 3303500  | 4.9  |
| Hauts-de-France            | 301                   | 7.9  | 309                    | 8.6  | 262               | 7.3  | 5962662  | 8.9  |
| Grand-Est                  | 255                   | 6.7  | 199                    | 5.5  | 205               | 5.7  | 5511747  | 8.3  |
| Pays de la Loire           | 119                   | 3.1  | 156                    | 4.3  | 135               | 3.8  | 3801797  | 5.7  |
| Bretagne                   | 129                   | 3.4  | 121                    | 3.4  | 95                | 2.6  | 3340379  | 5    |
| Nouvelle-Aquitaine         | 339                   | 8.8  | 328                    | 9.1  | 282               | 7.9  | 5999982  | 9    |
| Occitanie                  | 281                   | 7.3  | 250                    | 7    | 206               | 5.7  | 5924858  | 8.9  |
| Auvergne-Rhône-Alpes       | 233                   | 6.1  | 286                    | 8    | 234               | 6.5  | 8032377  | 12   |
| Provence-Alpes-Côte d'Azur | 453                   | 11.8 | 296                    | 8.2  | 397               | 11.1 | 5055651  | 7.6  |
| Corse                      | 14                    | 0.4  | 61                     | 1.7  | 76                | 2.1  | 344679   | 0.5  |

All available residual sera were included from French overseas regions (Guadeloupe, Martinique, French Guiana and La Reunion). Sample selection was stratified by age, sex and region for Metropolitan France.

*Supplementary Table 3: Combination of unadjusted results for the three serological assays by collection period.*

| LuLISA N | LuLISA S | PNT      | 9-15 March 2020 |      | 6-12 April 2020 |      | 11-17 May 2020 |      |
|----------|----------|----------|-----------------|------|-----------------|------|----------------|------|
|          |          |          | n               | %    | n               | %    | n              | %    |
| positive | positive | positive | 1               | 0.0  | 66              | 1.8  | 87             | 2.4  |
| positive | positive | negative | 0               | 0.0  | 13              | 0.4  | 6              | 0.2  |
| positive | negative | positive | 0               | 0.0  | 5               | 0.1  | 3              | 0.1  |
| negative | positive | positive | 0               | 0.0  | 9               | 0.3  | 13             | 0.4  |
| positive | negative | negative | 6               | 0.2  | 18              | 0.5  | 35             | 1.0  |
| negative | positive | negative | 20              | 0.5  | 37              | 1.0  | 32             | 0.9  |
| negative | negative | positive | 0               | 0.0  | 8               | 0.2  | 2              | 0.1  |
| negative | negative | negative | 3807            | 99.3 | 3439            | 95.7 | 3414           | 95.0 |
|          |          |          | 3834            | 100  | 3595            | 100  | 3592           | 100  |

Positivity thresholds in relative light units per second (RLU/s) are 39915 for LuLISA N, 27821 for LuLISA S and 14037 for Pseudo-neutralisation (PNT).

*Supplementary Table 4: Estimated prevalence of SARS-CoV-2 antibodies in French population from March-May 2020.*

|                            | <b>9-15 March 2020</b> | <b>6 -12 April 2020</b> | <b>11-17 May 2020</b> |
|----------------------------|------------------------|-------------------------|-----------------------|
|                            | Prevalence (95% CI)    | Prevalence (95% CI)     | Prevalence (95% CI)   |
| Overall                    | 0.4% (0.1-0.9)         | 4.1% (3.3-5.0)          | 4.9% (4.0-5.9)        |
| Sex                        |                        |                         |                       |
| Male                       | 0.5% (0.1-1.0)         | 4.5% (3.5-5.6)          | 5.4% (4.3-6.6)        |
| Female                     | 0.4% (0.0-0.8)         | 3.8% (2.9-4.7)          | 4.5% (3.6-5.5)        |
| Age group, years           |                        |                         |                       |
| 0-9                        | 0.2% (0.0-0.6)         | 2.3% (0.9-4.1)          | 2.7% (1.1-4.9)        |
| 10-19                      | 0.4% (0.0-0.8)         | 3.7% (2.3-5.3)          | 4.4% (2.9-6.2)        |
| 20-29                      | 0.4% (0.1-1.0)         | 4.3% (3.0-6.0)          | 5.2% (3.6-7.1)        |
| 30-39                      | 0.4% (0.0-0.8)         | 3.7% (2.4-5.1)          | 4.4% (2.9-6.0)        |
| 40-49                      | 0.5% (0.1-1.1)         | 4.9% (3.4-6.7)          | 5.9% (4.2-7.9)        |
| 50-59                      | 0.5% (0.1-1.1)         | 5.1% (3.7-6.8)          | 6.1% (4.4-8.0)        |
| 60-69                      | 0.5% (0.1-1.1)         | 5.1% (3.6-6.8)          | 6.0% (4.4-8.1)        |
| 70-79                      | 0.4% (0.0-0.9)         | 3.8% (2.6-5.2)          | 4.5% (3.1-6.1)        |
| ≥80                        | 0.4% (0.0-0.9)         | 4.1% (2.9-5.5)          | 4.8% (3.4-6.5)        |
| Regions                    |                        |                         |                       |
| Guadeloupe                 | 0.3% (0.0-0.7)         | 2.7% (1.4-4.4)          | 3.3% (1.7-5.1)        |
| Martinique                 | 0.2% (0.0-0.5)         | 2.0% (1.0-3.4)          | 2.4% (1.2-3.9)        |
| French Guiana              | 0.6% (0.1-1.4)         | 6.0% (3.3-9.9)          | 7.1% (4.0-11.5)       |
| La Reunion                 | 0.3% (0.0-0.8)         | 2.5% (0.8-4.9)          | 3.0% (1.0-5.8)        |
| Île-de-france              | 0.8% (0.1-1.6)         | 7.4% (5.7-9.4)          | 8.8% (6.9-11.0)       |
| Centre-Val-de-Loire        | 0.3% (0.0-0.7)         | 2.6% (1.1-4.6)          | 3.1% (1.3-5.4)        |
| Bourgogne-Franche Comté    | 0.4% (0.0-0.9)         | 3.6% (1.9-5.8)          | 4.3% (2.2-6.9)        |
| Normandie                  | 0.3% (0.0-0.8)         | 3.3% (1.9-5.1)          | 3.9% (2.3-6.0)        |
| Hauts-de-France            | 0.3% (0.0-0.7)         | 2.9% (1.7-4.4)          | 3.5% (2.1-5.3)        |
| Grand-Est                  | 0.7% (0.1-1.7)         | 7.2% (4.8-10.2)         | 8.6% (5.8-11.8)       |
| Pays de la Loire           | 0.3% (0.0-0.7)         | 2.9% (1.4-4.9)          | 3.5% (1.8-5.9)        |
| Bretagne                   | 0.2% (0.0-0.6)         | 2.1% (0.8-4.0)          | 2.6% (1.0-4.8)        |
| Nouvelle-Aquitaine         | 0.3% (0.0-0.6)         | 2.6% (1.5-4.0)          | 3.2% (1.8-4.7)        |
| Occitanie                  | 0.3% (0.0-0.6)         | 2.6% (1.3-4.1)          | 3.1% (1.6-4.9)        |
| Auvergne-Rhône-Alpes       | 0.4% (0.0-0.8)         | 3.7% (2.3-5.4)          | 4.4% (2.8-6.5)        |
| Provence-Alpes-Côte d'Azur | 0.3% (0.0-0.6)         | 2.8% (1.6-4.2)          | 3.3% (2.0-4.9)        |
| Corse                      | 0.3% (0.0-0.8)         | 3.2% (1.3-5.8)          | 3.8% (1.5-6.9)        |

Prevalence of SARS-CoV-2 antibodies was based on at least one positive test among LuLISA S, LuLISA N and pseudo-neutralisation assays (see main text).

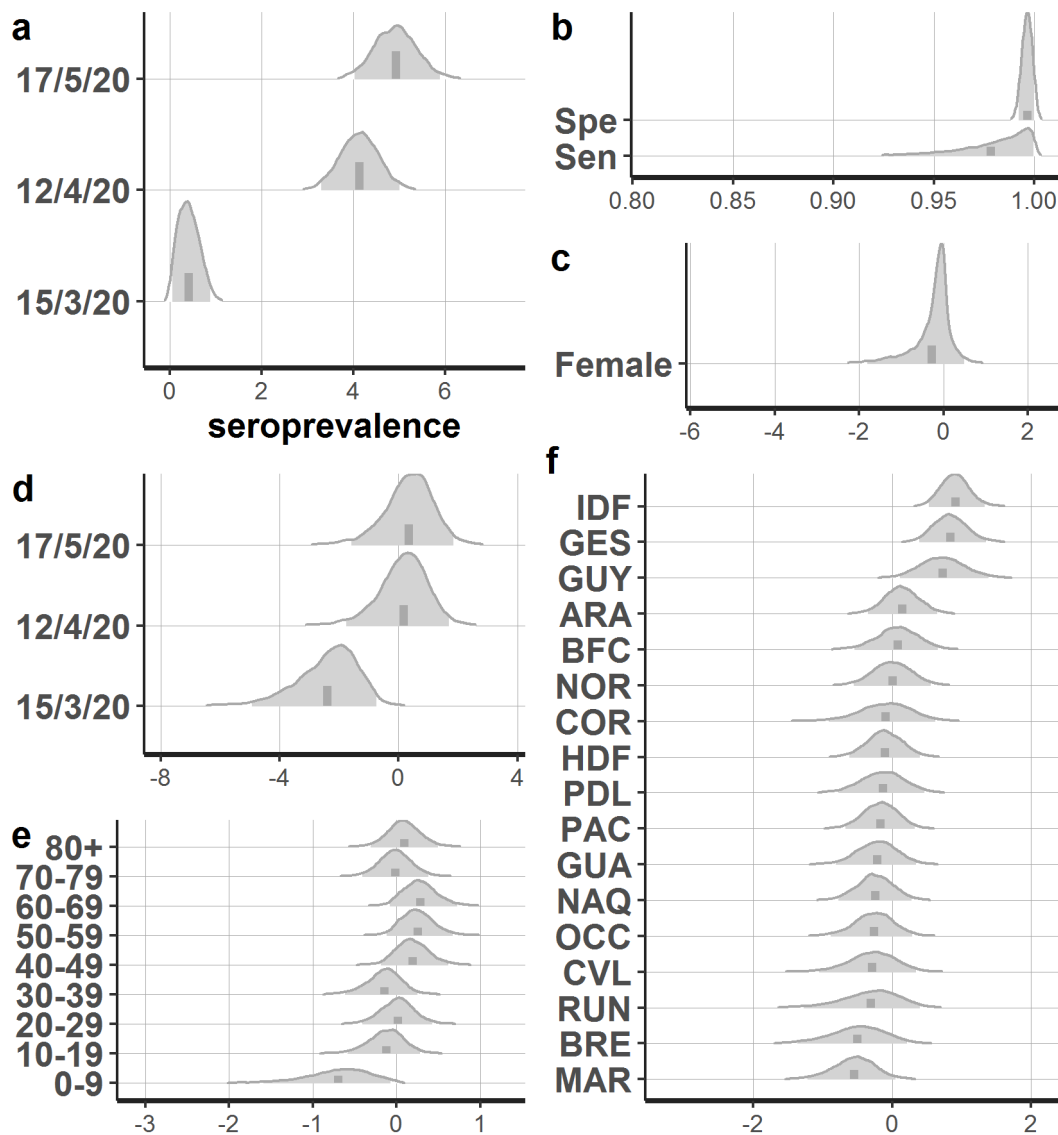

*Supplementary Figure 1: Posterior distributions of prevalence, test performance and regression coefficients.*

**a** Seroprevalence by study period . **b** Overall sensitivity and specificity. Regression coefficients for study period (**c**), sex (**d**), age class (**e**) and region (**f**). 90% uncertainty intervals (combining all chains) are in light grey and point estimates of mean in darker grey.
